# Supplementary material for: Identification of Non-HLA Genes Associated with Celiac Disease and Country-Specific Differences in a Large, International Pediatric Cohort
Source: PubMed Central journal article supplement (PMC4807782; doi:10.1371/journal.pone.0152476), 2016-03-25
Supplement: pone.0152476.s001.pdf [file pone.0152476.s001.pdf]

**S1 Table: Enrolled HLA genotypes in the TEDDY study**

| LETTER<br>CODE | FULL GENOTYPE                                         | ABBREV. |
|----------------|-------------------------------------------------------|---------|
| A              | DRB1*04-DQA1*03-DQB1*03:02/DRB1*03-DQA1*05-DQB1*02:01 | DR 3/4  |
| B              | DRB1*04-DQA1*03-DQB1*03:02/DRB1*04-DQA1*03-DQB1*03:02 | DR 4/4  |
| C              | DRB1*04-DQA1*03-DQB1*03:02/DRB1*08-DQA1*04-DQB1*04:02 | DR 4/8  |
| D              | DRB1*03-DQA1*05-DQB1*02:01/DRB1*03-DQA1*05-DQB1*02:01 | DR 3/3  |
| E              | DRB1*04-DQA1*03-DQB1*03:02/DRB1*04-DQA1*03-DQB1*02:02 | DR 4/4* |
| F              | DRB1*04-DQA1*03-DQB1*03:02/DRB1*01-DQA1*01-DQB1*05:01 | DR 4/1  |
| G              | DRB1*04-DQA1*03-DQB1*03:02/DRB1*13-DQA1*01-DQB1*06:04 | DR 4/13 |
| I              | DRB1*04-DQA1*03-DQB1*03:02/DRB1*09-DQA1*03-DQB1*03:03 | DR 4/9  |
| J              | DRB1*03-DQA1*05-DQB1*02:01/DRB1*09-DQA1*03-DQB1*03:03 | DR 3/9  |

Note: genotypes A, B, C and D confer general population eligibility but exclude DRB1\*04:03. Genotypes A through J confer eligibility to a first-degree relative of a diabetic patient. where DQB1\*03:02 is noted, either this allele or DQB1\*03:04 is allowed. see Hagopian et al 2011 Pediatric Diabetes 17:733-43.
