# Supplementary material for: Identification of Non-HLA Genes Associated with Celiac Disease and Country-Specific Differences in a Large, International Pediatric Cohort
Source: PubMed Central journal article supplement (PMC4807782; doi:10.1371/journal.pone.0152476), 2016-03-25
Supplement: pone.0152476.s002.pdf [file pone.0152476.s002.pdf]

**S2 Table. Characteristics for Celiac Disease Autoimmunity**

|                                                      | <b>703 subjects<br/>Developed tTGA</b> | <b>4676 subjects did<br/>not develop tTGA</b> | <b>HR (95%CI)<sup>a</sup></b>  | <b>p<sup>a</sup></b> |
|------------------------------------------------------|----------------------------------------|-----------------------------------------------|--------------------------------|----------------------|
|                                                      | <b>mean (SD) or N (%)</b>              | <b>mean (SD) or N (%)</b>                     |                                |                      |
| Age at first tTG+ visit or most recent visit (years) | 3.06 (SD=1.33)                         | 4.84 (SD=1.67)                                |                                |                      |
| Country                                              |                                        |                                               |                                |                      |
| US                                                   | 191 (27.2)                             | 1594 (34.1)                                   |                                |                      |
| Finland                                              | 167 (23.7)                             | 1247 (26.7)                                   |                                |                      |
| Germany                                              | 37 (5.3)                               | 291 (6.2)                                     |                                |                      |
| Sweden                                               | 308 (43.8)                             | 1544 (33.0)                                   |                                |                      |
| Family History of celiac disease                     |                                        |                                               |                                |                      |
| Yes                                                  | 39 (5.6)                               | 102 (2.2)                                     | 1.68 (1.21, 2.32)              | 0.002                |
| HLA-DR, -DQ genotype                                 |                                        |                                               |                                | < 0.001 <sup>c</sup> |
| DR3-DQ2/DR3-DQ2                                      | 312 (44.4)                             | 823 (17.6)                                    | 3.46 (2.60, 4.60)              |                      |
| DR3-DQ2/X                                            | 272 (38.7)                             | 1879 (40.2)                                   | 1.36 (1.06, 1.75)              |                      |
| DR4-DQ8/DR4-DQ8                                      | 93 (13.2)                              | 943 (20.2)                                    | 1                              |                      |
| Other                                                | 26 (3.7)                               | 1031 (22.0)                                   | 0.25 (0.16, 0.38)              |                      |
| HLA DPB1                                             |                                        |                                               |                                |                      |
| 0                                                    | 300 (42.7)                             | 1537 (32.9)                                   |                                |                      |
| 1                                                    | 319 (45.4)                             | 2279 (48.7)                                   | 0.81 (0.73, 0.91) <sup>b</sup> | < 0.001              |
| 2                                                    | 84 (11.9)                              | 860 (18.4)                                    |                                |                      |
| Gender                                               |                                        |                                               |                                |                      |
| Female                                               | 421 (59.9)                             | 2215 (47.4)                                   | 1.71 (1.47, 1.99)              | < 0.001              |

<sup>a</sup>HRs and p-values adjusted for family history of celiac disease, HLA-DR\_DQ genotype, gender, HLA DPB1, population stratification (ancestral heterogeneity) and country of residence (as strata).

<sup>b</sup> HR for an increase of one copy of minor allele.

<sup>c</sup> P-value from the test of no different effects among the four HLA-DR-DQ genotype groups.
