# Supplementary material for: Identification of Non-HLA Genes Associated with Celiac Disease and Country-Specific Differences in a Large, International Pediatric Cohort
Source: PubMed Central journal article supplement (PMC4807782; doi:10.1371/journal.pone.0152476), 2016-03-25
Supplement: pone.0152476.s003.pdf [file pone.0152476.s003.pdf]

**S3 Table. Characteristics for Celiac Disease**

|                                                                          | <b>288 subjects<br/>developed celiac<br/>disease</b> | <b>5722 subjects did<br/>not develop tTGA</b> | <b>HR (95%CI)<sup>a</sup></b>  | <b>p<sup>a</sup></b> |
|--------------------------------------------------------------------------|------------------------------------------------------|-----------------------------------------------|--------------------------------|----------------------|
|                                                                          | <b>mean (SD) or N (%)</b>                            | <b>mean (SD) or N (%)</b>                     |                                |                      |
| Age at celiac disease<br>diagnosis visit or most<br>recent visit (years) | 3.87 (SD=1.40)                                       | 4.88 (SD=1.97)                                |                                |                      |
| Country                                                                  |                                                      |                                               |                                |                      |
| US                                                                       | 83 (28.8)                                            | 1945 (34.0)                                   |                                |                      |
| Finland                                                                  | 53 (18.4)                                            | 1498 (26.2)                                   |                                |                      |
| Germany                                                                  | 9 (3.1)                                              | 390 (6.8)                                     |                                |                      |
| Sweden                                                                   | 143 (49.7)                                           | 1889 (33.0)                                   |                                |                      |
| Family History of celiac<br>disease                                      |                                                      |                                               |                                |                      |
| Yes                                                                      | 25 (8.7)                                             | 123 (2.2)                                     | 2.67 (1.75, 4.06)              | < 0.001              |
| HLA-DR, -DQ genotype                                                     |                                                      |                                               |                                | < 0.001 <sup>c</sup> |
| DR3-DQ2/DR3-DQ2                                                          | 154 (53.5)                                           | 1120 (19.6)                                   | 3.19 (2.07, 4.92)              |                      |
| DR3-DQ2/X                                                                | 90 (31.3)                                            | 2298 (40.2)                                   | 0.96 (0.64, 1.42)              |                      |
| DR4-DQ8/DR4-DQ8                                                          | 40 (13.9)                                            | 1118 (19.5)                                   | 1                              |                      |
| Other                                                                    | 4 (1.4)                                              | 1186 (20.7)                                   | 0.10 (0.04, 0.28)              |                      |
| HLA DPB1                                                                 |                                                      |                                               |                                |                      |
| 0                                                                        | 132 (45.8)                                           | 1936 (33.8)                                   |                                |                      |
| 1                                                                        | 118 (41.0)                                           | 2762 (48.3)                                   | 0.81 (0.68, 0.97) <sup>b</sup> | 0.021                |
| 2                                                                        | 38 (13.2)                                            | 1024 (17.9)                                   |                                |                      |
| Gender                                                                   |                                                      |                                               |                                |                      |
| Female                                                                   | 187 (64.9)                                           | 2756 (48.2)                                   | 2.15 (1.69, 2.75)              | < 0.001              |

<sup>a</sup>HRs and p-values adjusted for family history of celiac disease, HLA-DR\_DQ genotype, gender, HLA DPB1, population stratification (ancestral heterogeneity) and country of residence (as strata).

<sup>b</sup>HR for an increase of one copy of minor allele.

<sup>c</sup>P-value from the test of no different effects among the four HLA-DR-DQ genotype groups.
