# Supplementary material for: Identification of Non-HLA Genes Associated with Celiac Disease and Country-Specific Differences in a Large, International Pediatric Cohort
Source: PubMed Central journal article supplement (PMC4807782; doi:10.1371/journal.pone.0152476), 2016-03-25
Supplement: pone.0152476.s004.pdf [file pone.0152476.s004.pdf]

**S4 Table. Analysis of reported celiac disease risk variants**

| SNPs       | Region   | Chr_id | Reported Genes                      | MAF   | HR-CD | P-CD   | HR-TG | P-TG   |
|------------|----------|--------|-------------------------------------|-------|-------|--------|-------|--------|
| rs3748816  | 1p36.32  | 1      | TNFRSF14, MMEL1                     | 0.335 | 1.05  | 0.6200 | 1.004 | 0.9386 |
| rs12727642 | 1p36.23  | 1      | PARK7, TNFRSF9                      | 0.199 | 0.97  | 0.7957 | 0.981 | 0.7744 |
| rs10903122 | 1p36.11  | 1      | RUNX3                               | 0.502 | 0.88  | 0.1295 | 1.010 | 0.8502 |
| rs6691768  | 1p31.3   | 1      | NFIA                                | 0.388 | 0.93  | 0.4332 | 0.943 | 0.2906 |
| rs864537   | 1q24.2   | 1      | CD247                               | 0.369 | 0.88  | 0.1380 | 0.869 | 0.0133 |
| rs859637   | 1q24.3   | 1      | FASLG, TNFSF18, TNFSF4              | 0.499 | 0.97  | 0.7405 | 0.938 | 0.2265 |
| rs2816316  | 1q31.2   | 1      | RGS1                                | 0.177 | 0.81  | 0.0757 | 0.859 | 0.0378 |
| rs296547   | 1q32.1   | 1      | Intergenic                          | 0.378 | 1.02  | 0.8063 | 1.023 | 0.6851 |
| rs7579944  | 2p23.1   | 2      | LBH                                 | 0.380 | 0.95  | 0.5830 | 1.033 | 0.5625 |
| rs13003464 | 2p16.1   | 2      | REL, AHS2                           | 0.389 | 1.05  | 0.5542 | 0.949 | 0.3387 |
| rs1876518  | 2p14     | 2      | SPRED2                              | 0.425 | 0.97  | 0.7254 | 1.100 | 0.0774 |
| rs17035378 | 2p14     | 2      | PLEK                                | 0.279 | 0.75  | 0.0037 | 0.914 | 0.1437 |
| rs13015714 | 2q12.1   | 2      | IL1RL1,IL18R1,IL18RAP, SLC9A4       | 0.239 | 1.42  | 0.0001 | 1.153 | 0.0201 |
| rs7574865  | 2q32.3   | 2      | STAT4                               | 0.226 | 0.97  | 0.7866 | 1.140 | 0.0358 |
| rs4675374  | 2q33.2   | 2      | CTLA4, ICOS, CD28                   | 0.206 | 0.92  | 0.4494 | 1.111 | 0.1024 |
| rs13314993 | 3p22.3   | 3      | CCR4                                | 0.427 | 1.10  | 0.2536 | 0.993 | 0.8990 |
| rs13098911 | 3p21.31  | 3      | CCR1, CCR2, CCRL2, CCR3, CCR5, CCR9 | 0.102 | 1.29  | 0.0411 | 1.124 | 0.1622 |
| rs6441961  | 3p21.31  | 3      | CCR1, CCR3                          | 0.300 | 1.07  | 0.4552 | 1.034 | 0.5642 |
| rs6806528  | 3p14.1   | 3      | FRMD4B                              | 0.096 | 1.44  | 0.0041 | 1.131 | 0.1631 |
| rs11712165 | 3q13.33  | 3      | CD80, KTELC1                        | 0.394 | 1.17  | 0.0637 | 1.120 | 0.0352 |
| rs17810546 | 3q25.33  | 3      | IL12A                               | 0.122 | 1.10  | 0.4453 | 0.970 | 0.7102 |
| rs10936599 | 3q26.2   | 3      | Intergenic                          | 0.257 | 1.10  | 0.3025 | 1.147 | 0.0224 |
| rs1464510  | 3q28     | 3      | LPP                                 | 0.473 | 1.28  | 0.0023 | 1.163 | 0.0043 |
| rs13151961 | 4q27     | 4      | IL2, IL21                           | 0.148 | 0.84  | 0.1640 | 0.975 | 0.7382 |
| rs6822844  | 4q27     | 4      | KIAA1109, ADAD1, IL2, IL21          | 0.152 | 0.86  | 0.1975 | 0.982 | 0.8048 |
| rs1033180  | 6p25.3   | 6      | IRF4                                | 0.092 | 1.06  | 0.6929 | 0.955 | 0.6203 |
| rs424232   | 6p21.32  | 6      | HLA                                 | 0.430 | 0.92  | 0.6553 | 0.950 | 0.6502 |
| rs2187668  | 6p21.32  | 6      | HLA-DQA1, HLA-DQB1                  | 0.409 | 1.39  | 0.6185 | 0.936 | 0.8706 |
| rs10806425 | 6q15     | 6      | BACH2, MAP3K7                       | 0.357 | 1.05  | 0.5825 | 0.994 | 0.9091 |
| rs802734   | 6q22.33  | 6      | PTPRK, THEMIS                       | 0.300 | 1.21  | 0.0336 | 1.124 | 0.0456 |
| rs2327832  | 6q23.3   | 6      | TNFAIP3                             | 0.211 | 1.24  | 0.0251 | 1.055 | 0.4029 |
| rs1738074  | 6q25.3   | 6      | TAGAP                               | 0.413 | 1.17  | 0.0594 | 1.088 | 0.1191 |
| rs6974491  | 7p14.1   | 7      | ELMO1                               | 0.167 | 1.12  | 0.2915 | 1.005 | 0.9435 |
| rs9792269  | 8q24.21  | 8      | Intergenic                          | 0.211 | 0.89  | 0.2905 | 0.977 | 0.7228 |
| rs1953126  | 9q33.2   | 9      | TRAF1                               | 0.380 | 1.02  | 0.8247 | 1.051 | 0.3557 |
| rs1250552  | 10q22.3  | 10     | ZMIZ1                               | 0.498 | 1.15  | 0.0975 | 1.101 | 0.0735 |
| rs10892279 | 11q23.3  | 11     | DDX6                                | 0.213 | 0.97  | 0.7620 | 1.051 | 0.4442 |
| rs11221332 | 11q24.3  | 11     | ETS1                                | 0.226 | 1.29  | 0.0062 | 1.011 | 0.8669 |
| rs10876993 | 12q13.3  | 12     | CDK4                                | 0.353 | 0.84  | 0.0422 | 0.955 | 0.4096 |
| rs653178   | 12q24.12 | 12     | SH2B3                               | 0.465 | 1.30  | 0.0019 | 1.082 | 0.1486 |
| rs2762051  | 13q14.2  | 13     | Intergenic                          | 0.204 | 1.05  | 0.6148 | 0.984 | 0.8050 |
| rs12928822 | 16p13.13 | 16     | CIITA, SOCS1, CLEC16A               | 0.161 | 1.12  | 0.2733 | 0.988 | 0.8713 |
| rs17760268 | 17q22    | 17     | ANKFN1, NOG                         | 0.067 | 1.00  | 0.9880 | 1.151 | 0.1719 |
| rs1893217  | 18p11.21 | 18     | PTPN2                               | 0.167 | 1.19  | 0.0985 | 0.924 | 0.2779 |
| rs11203203 | 21q22.3  | 21     | UBASH3A                             | 0.349 | 1.10  | 0.2538 | 1.131 | 0.0277 |
| rs4819388  | 21q22.3  | 21     | ICOSLG                              | 0.262 | 0.97  | 0.7777 | 0.957 | 0.4765 |
| rs2298428  | 22q11.21 | 22     | UBE2L3, YDJC                        | 0.226 | 1.27  | 0.0124 | 1.172 | 0.0110 |
| rs5979785  | Xp22.2   | X      | TLR7, TLR8                          | 0.260 | 0.93  | 0.3771 | 1.002 | 0.9703 |

HR-CD: Hazard ratio for celiac disease; P-CD: P-value for celiac disease; HR-TG: Hazard ratio for celiac disease autoimmunity; P-TG: P-value for celiac disease autoimmunity; Highlighted cells represent P<0.05
