# Supplementary material for: Identification of Non-HLA Genes Associated with Celiac Disease and Country-Specific Differences in a Large, International Pediatric Cohort
Source: PubMed Central journal article supplement (PMC4807782; doi:10.1371/journal.pone.0152476), 2016-03-25
Supplement: pone.0152476.s005.pdf [file pone.0152476.s005.pdf]

**S5 Table. Analysis of celiac disease risk variants only in Sweden population**

| SNP                | CHR       | BP              | MAF                | HR-CD       | P-CD            | HR-TGA      | P-TGA           | # SNPS (P<10 <sup>-4</sup> ) | Nearby Gene                |
|--------------------|-----------|-----------------|--------------------|-------------|-----------------|-------------|-----------------|------------------------------|----------------------------|
| rs115195008        | 1         | 195885068       | 0.024712092        | 2.71        | 1.17E-03        | 2.45        | 6.03E-05        | 1                            | DENND1B                    |
| rs12060029         | 1         | 210638198       | 0.04328            | 2.56        | 4.15E-05        | 1.87        | 3.12E-04        | 1                            | TMEM206                    |
| rs72704176         | 1         | 153692482       | 0.023752399        | 3.10        | 1.52E-05        | 1.64        | 2.27E-02        | 2                            | ASH1L                      |
| rs1829618          | 2         | 212141570       | 0.189230277        | 1.68        | 7.84E-05        | 1.23        | 3.37E-02        | 1                            | ERBB4                      |
| rs1163374          | 3         | 110423193       | 0.251279591        | 1.76        | 1.60E-05        | 1.35        | 1.05E-03        | 2                            | MORC1, DPPA2               |
| rs2014777          | 4         | 70706332        | 0.290147153        | 1.18        | 2.10E-01        | 1.43        | 3.98E-05        | 1                            | SULT1D1P                   |
| rs6842780          | 4         | 54320985        | 0.463218577        | 0.65        | 5.44E-04        | 0.71        | 5.37E-05        | 1                            | RP11-317M11.1              |
| rs1054091          | 6         | 159389500       | 0.166426743        | 1.85        | 1.02E-05        | 1.37        | 2.02E-03        | 1                            | TAGAP                      |
| rs1367730          | 6         | 33166092        | 0.32863772         | 2.02        | 6.18E-05        | 1.50        | 4.26E-04        | 1                            | HLA-DPB1,HLA-DPA2          |
| rs857415           | 6         | 14767762        | 0.424424184        | 1.39        | 5.65E-03        | 1.38        | 7.97E-05        | 1                            | RP11-330A16.1,LOC102724463 |
| <b>rs117128341</b> | <b>8</b>  | <b>79612329</b> | <b>0.039833627</b> | <b>2.78</b> | <b>6.52E-08</b> | <b>1.65</b> | <b>1.50E-03</b> | <b>5</b>                     | <b>PKIA</b>                |
| rs10511729         | 9         | 23547227        | 0.304              | 0.54        | 3.56E-05        | 0.85        | 7.97E-02        | 1                            | LOC101929563               |
| rs76554494         | 9         | 122430566       | 0.07662774         | 2.15        | 1.84E-05        | 1.30        | 6.96E-02        | 3                            | MEGF9                      |
| <b>rs117139146</b> | <b>10</b> | <b>6240562</b>  | <b>0.013515675</b> | <b>4.85</b> | <b>2.78E-07</b> | <b>2.79</b> | <b>7.34E-05</b> | <b>1</b>                     | <b>PFKFB3</b>              |
| rs9423406          | 10        | 5343690         | 0.17234485         | 1.78        | 3.98E-05        | 1.27        | 2.02E-02        | 1                            | AKR1C7P,RPL26P28           |
| rs17038814         | 12        | 105774382       | 0.12893937         | 1.47        | 1.87E-02        | 1.57        | 5.33E-05        | 1                            | RIC8B                      |
| rs2037744          | 12        | 16191109        | 0.12571977         | 1.64        | 1.48E-03        | 1.56        | 5.57E-05        | 1                            | DERA,SLC15A5               |
| rs77013804         | 13        | 43377822        | 0.035268714        | 1.71        | 4.43E-02        | 2.09        | 4.42E-05        | 1                            | LACC1                      |
| rs9914860          | 17        | 72848875        | 0.464165733        | 0.60        | 3.53E-05        | 0.82        | 1.88E-02        | 2                            | SEPT9                      |
| rs2534116          | 23        | 88571714        | 0.25536859         | 0.44        | 4.93E-06        | 0.59        | 6.14E-06        | 1                            | LOC102724150               |

Regions with P<10<sup>-4</sup> in either tTGA or celiac disease analysis are presented in this table.

HR-CD: Hazard ratio for celiac disease; P-CD: P-value for celiac disease; HR-TG: Hazard ratio for celiac disease autoimmunity; P-TG: P-value for celiac disease autoimmunity; Highlighted cells represent P<10<sup>-4</sup>
