# Supplementary material for: Identification of Non-HLA Genes Associated with Celiac Disease and Country-Specific Differences in a Large, International Pediatric Cohort
Source: PubMed Central journal article supplement (PMC4807782; doi:10.1371/journal.pone.0152476), 2016-03-25
Supplement: pone.0152476.s006.pdf [file pone.0152476.s006.pdf]

**S6 Table. Risk Variants that have been reported but are not on the IChip**

| SNPs       | Region   | Chr_id | Chr_pos   | Reported Genes.                                                     | Strongest SNP Risk Allele | Pvalue mlog |
|------------|----------|--------|-----------|---------------------------------------------------------------------|---------------------------|-------------|
| rs1020388  | 5q11.2   | 5      | 56264200  | ANKRD55                                                             | rs1020388-?               | 6.523       |
| rs1032355  | 4q23     | 4      | 99618739  | RG9MTD2, C4orf17, MTTTP                                             | rs1032355-C               | 5.301       |
| rs10439884 | 21p11.1  | 21     | 10540506  | BAGE2, TPTE, BAGE                                                   | rs10439884-A              | 5.699       |
| rs10886159 | 10q26.11 | 10     | 117854099 | EMX2OS, RAB11FIP2, EMX2                                             | rs10886159-C              | 6.155       |
| rs11984075 | 7p14.1   | 7      | 37397251  | ELMO1                                                               | rs11984075-G              | 7.301       |
| rs12734338 | 1q32.1   | 1      | 202500595 | PPP1R12B, SYT2, UBE2T                                               | rs12734338-C              | 6.523       |
| rs13010713 | 2q31.3   | 2      | 181131318 | ITGA4, UBE2E3                                                       | rs13010713-G              | 10.301      |
| rs13128441 | 4p16.2   | 4      | 5160662   | STK32B                                                              | rs13128441-C              | 5.097       |
| rs157640   | 20q13.2  | 20     | 54798000  | DOK5                                                                | rs157640-G                | 5.301       |
| rs1772408  | 1q23.1   | 1      | 159035859 | IFI16                                                               | rs1772408-?               | 6.097       |
| rs195656   | 16q22.2  | 16     | 71013581  | HYDIN                                                               | rs195656-A                | 5.155       |
| rs1958589  | 14q13.1  | 14     | 34375170  | EAPP, SNX6, C14orf147                                               | rs1958589-C               | 5.398       |
| rs2068824  | 1q32.1   | 1      | 201625537 | NAV1                                                                | rs2068824-C               | 5.222       |
| rs2074404  | 17q21.31 | 17     | 46788073  | Intergenic                                                          | rs2074404-?               | 6.000       |
| rs2605393  | 3p22.3   | 3      | 36368109  | STAC                                                                | rs2605393-G               | 5.222       |
| rs2664156  | 19q13.33 | 19     | 50873907  | KLK2, KLK3, KLKP1, KLK4, KLK15                                      | rs2664156-C               | 5.222       |
| rs4899260  | 14q24.1  | 14     | 68811487  | ZFP36L1                                                             | rs4899260-A               | 6.398       |
| rs4911642  | 22q11.1  | 22     | 15473564  | CCT8L2, psiTPTE22                                                   | rs4911642-C               | 5.301       |
| rs4930144  | 11p15.5  | 11     | 2027258   | IGF2AS, TH, MRPL23, TNNT3, SYT8, ASCL2, TNNI2, LSP1, IGF2, INS, H19 | rs4930144-A               | 5.155       |
| rs917997   | 2q12.1   | 2      | 102454108 | IL18RAP, IL18R1, IL1RL1, IL1RL2                                     | rs917997-A                | 15.000      |
| rs975730   | 8q24.21  | 8      | 128303768 | Intergenic                                                          | rs975730-?                | 7.699       |
