# Supplementary material for: Identification of Non-HLA Genes Associated with Celiac Disease and Country-Specific Differences in a Large, International Pediatric Cohort
Source: PubMed Central journal article supplement (PMC4807782; doi:10.1371/journal.pone.0152476), 2016-03-25

## S2 Fig: SNPs associated with celiac disease risk

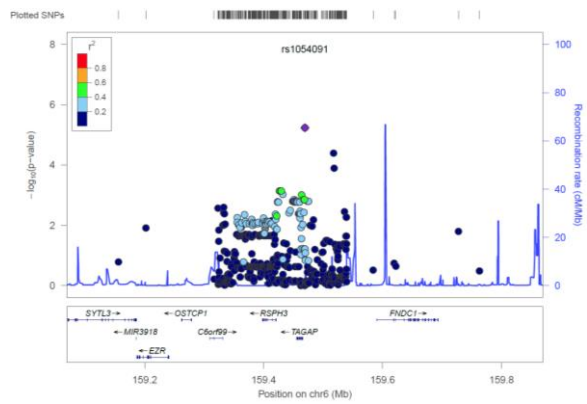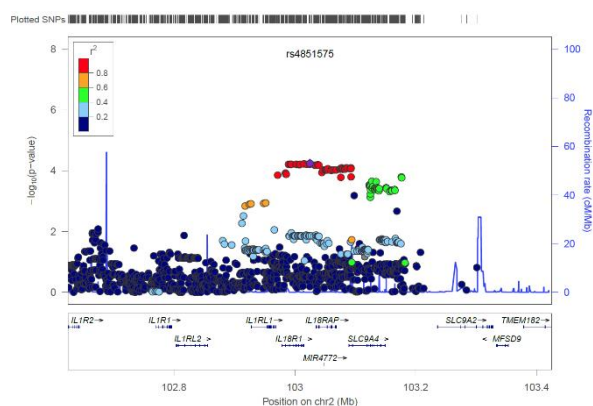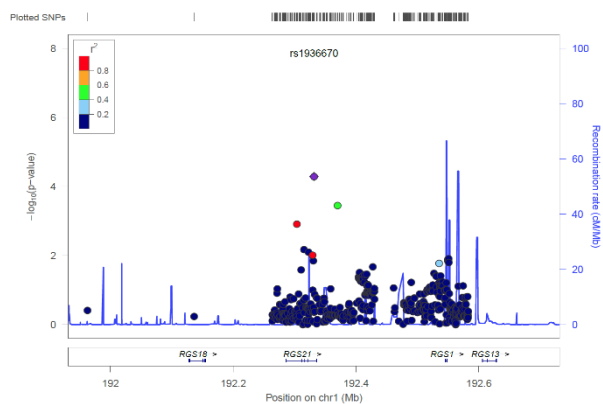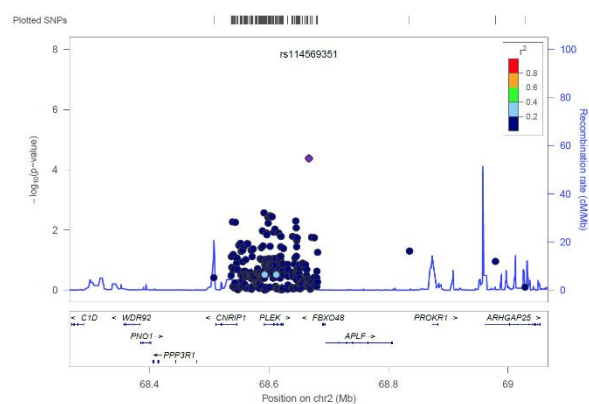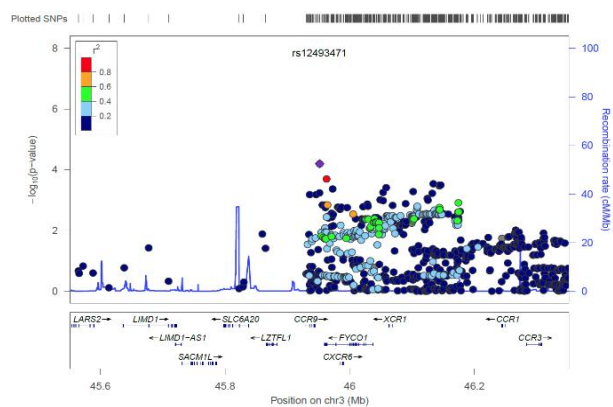

Supplement: pone.0152476.s008.pdf [file pone.0152476.s008.pdf]
